# Supplementary material
Source: PubMed Central journal article supplement (PMC6324180)

## SUPPLEMENTAL MATERIAL

Figure S1. Examples of coronary  $^{18}\text{F}$ -NaF uptake on hybrid (PET/CTA2) data (left column) and corresponding prior CTA (PET/CTA1) datasets (right column).

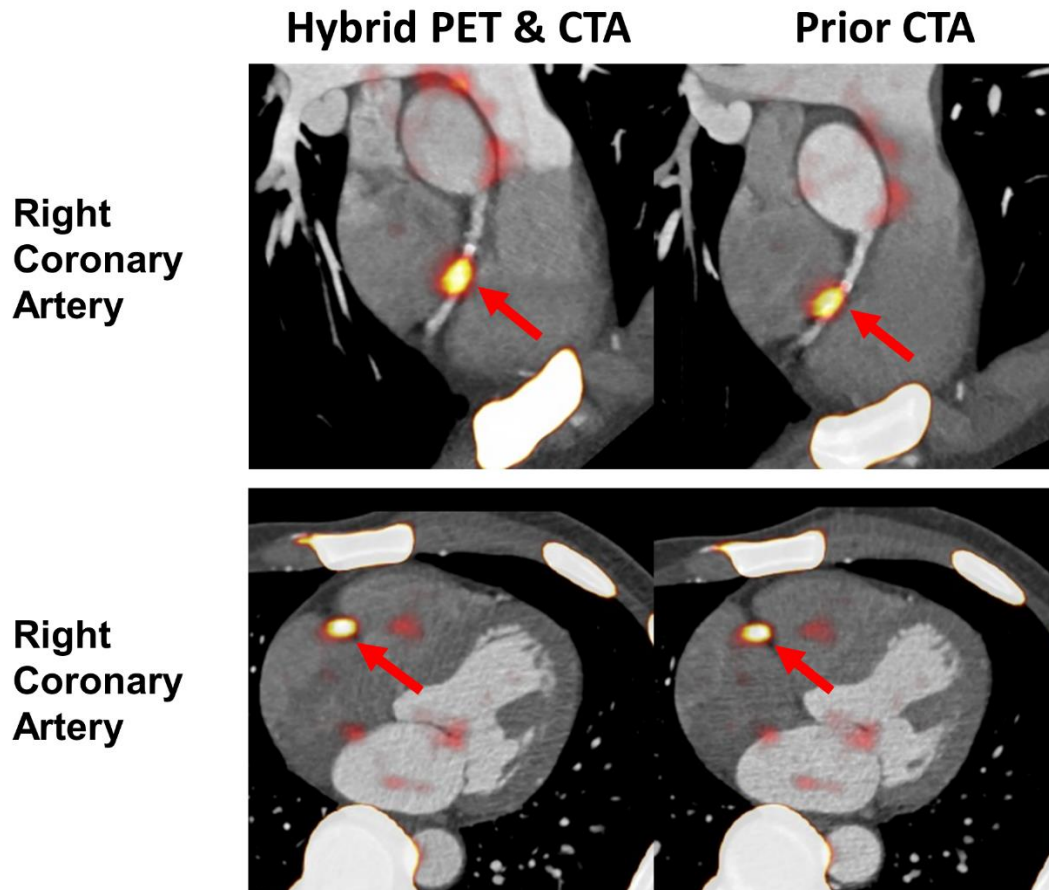

**Hybrid PET & CTA**

**Prior CTA**

**Left Anterior  
Descending  
Coronary  
Artery**

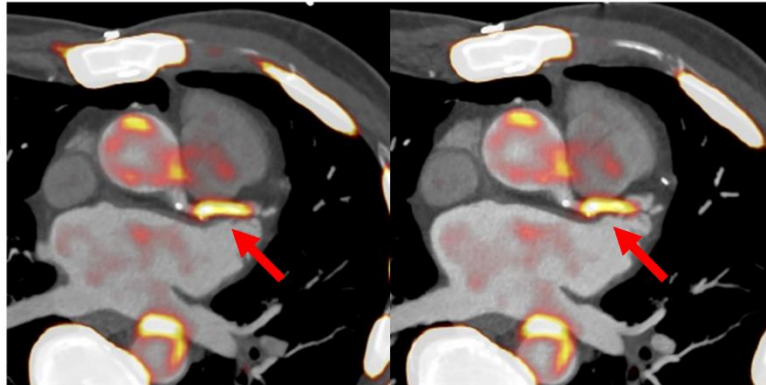

**Left Main  
Coronary  
Artery**

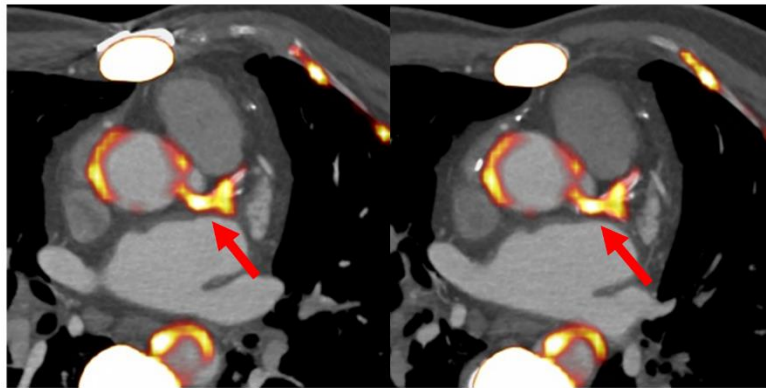

**Right  
Coronary  
Artery**

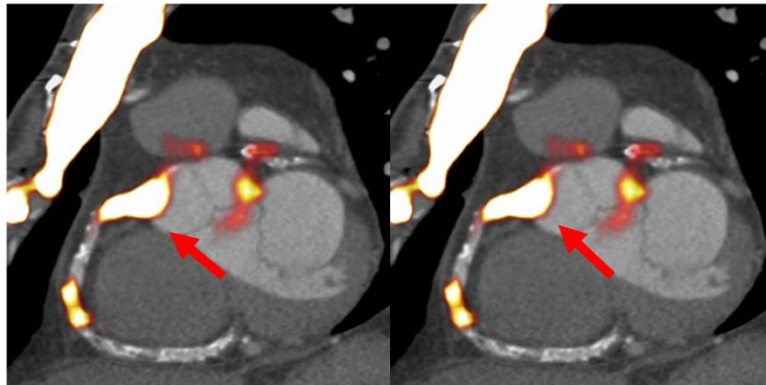

**Right  
Coronary  
Artery**

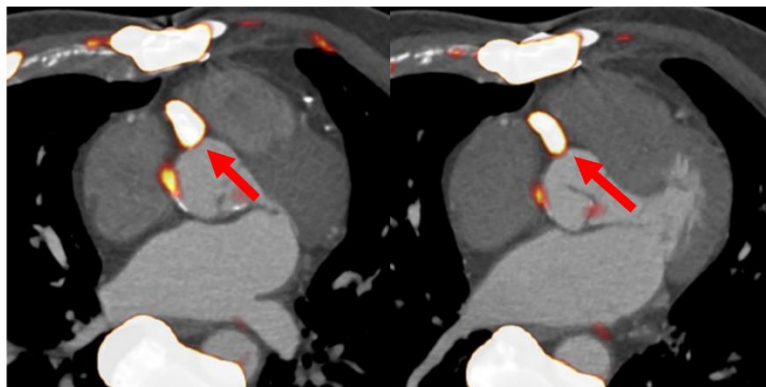

Supplement: NIHMS998285-supplement-Supplement.pdf [file NIHMS998285-supplement-Supplement.pdf]
